# Supplementary material
Source: PubMed Central journal article supplement (PMC3321173)
Supplement: emboj2011500s1.pdf [file emboj2011500s1.pdf]

**Supplemental figure legends, figures, and tables:**

**Figure S1. Inactivation of Mtg16 leads to enhanced Gr1<sup>+</sup>/Mac1<sup>+</sup> production after competitive bone marrow transplantation with impaired lymphoid production.** (A) Flow cytometry analysis of CD45.2<sup>+</sup> bone marrow cells that were Gr1<sup>+</sup>/Mac1<sup>+</sup> or B220<sup>+</sup> 12 weeks after a competitive repopulation assay. Shown is a representative plot from an experiment performed in triplicate that is consistent with other biological replicates. (B) Flow cytometry analysis of CD45.2<sup>+</sup> thymocytes 12 weeks after a competitive repopulation assay. Shown is a representative plot from an experiment performed in triplicate that is consistent with other biological replicates.

**Figure S2. Flow cytometry analysis of LSK (A) or LSK/Flt3<sup>-</sup> (B) cells to determine the percentage of CD45.2 that had repopulated the bone marrow 12 weeks after a competitive repopulation assay.** Shown is a representative plot from an experiment performed in triplicate that is consistent with other biological replicates. Graphical representation of quantified data is shown in Fig. 2.

**Figure S3. Flow cytometry analysis of LSK (A) or LSK/Flt3<sup>-</sup> (B) cells to determine the percentage of CD45.2 that had repopulated the bone marrow 6 weeks after a secondary competitive bone marrow transplant.** Shown is a representative plot from an experiment performed in triplicate that is consistent with other biological replicates. Graphical representation of quantified data is shown in Fig. 3.

**Figure S4. Wild type stromal cells express low to undetectable levels of Mtg16.** Table displaying the average cycle threshold (C<sub>t</sub>) from quantitative real-time PCR for MTG family members in MEL cells, WT bone marrow stroma, and WT MEFs. MEL, murine erythroleukemia cells; WT, wild type; BM, bone marrow; MEF, murine embryo fibroblasts; N/D, not detected. Data are shown as an average from two biological replicates.

**Figure S5. Expression levels of Mtg16 mutant constructs.** (A) Immunoblot analysis of BOSC cell lysates shows the expression of Myc epitope tagged forms of Mtg16 protein after transfection with MSCV plasmids containing wild type (Mtg16) or Mtg16 mutant (F210A and R220A) constructs using anti-c-Myc. (B) Flow cytometry analysis of bone marrow cells 5 days after infection with indicated MSCV-Mtg16 constructs to detect GFP expression from the MSCV-Mtg16-IRES-GFP constructs.

**Figure S6. Chromatin immunoprecipitation analysis of *Cyclin D1*, *N-Myc* and *Mtg16*.** ChIP was performed with either control IgG or anti-Mtg16/Eto2 from lysates of MEL cells. Immunopurified DNA was amplified with primers flanking a TCF4 binding site or both an E box and a CSL binding site in the *Cyclin D1* gene (*Ccnd1*) or regions encompassing a TCF4 binding site in *N-Myc*. ChIP of an E box site in *Mtg16* was used as a positive control. Graph shows the level of quantitative PCR signal relative to IgG set to “1”.

**Figure S7. Quantification of cycling stem and progenitor cells.** (A) Graph shows the quantification of the number of LSK BrdU<sup>+</sup> cells from biological replicates in Fig. 7A. (B) Quantification of the percentage of G<sub>0</sub> LSK cells from biological replicates from Fig. 7B is shown graphically at the right (wild type, empty bars; *Mtg16*-null, full bars). (C) Cell cycle status of LSK/Flt3<sup>-</sup> cells was analyzed using BrdU. Mice were injected with 1 mg of BrdU, and 2 hours later the bone marrow was harvested and lineage depleted. The lineage negative cells were then stained using anti-c-Kit, anti-Sca1, anti-Flt3 and anti-BrdU. Shown is a representative FACS plot from an experiment performed with 6 mice that is consistent with other biological replicates. Graphical representation of quantified data is shown in Fig. 7C. (D) Cell cycle status of LSK/SLAM cells was analyzed using BrdU as described in C. The lineage negative cells were then stained using anti-c-Kit, anti-Sca1, anti-CD48, anti-CD150 and anti-BrdU. Shown is a

representative FACS plot from an experiment performed with 7 mice that is consistent with other biological replicates. Graphical representation of quantified data is shown in Fig. 7D.

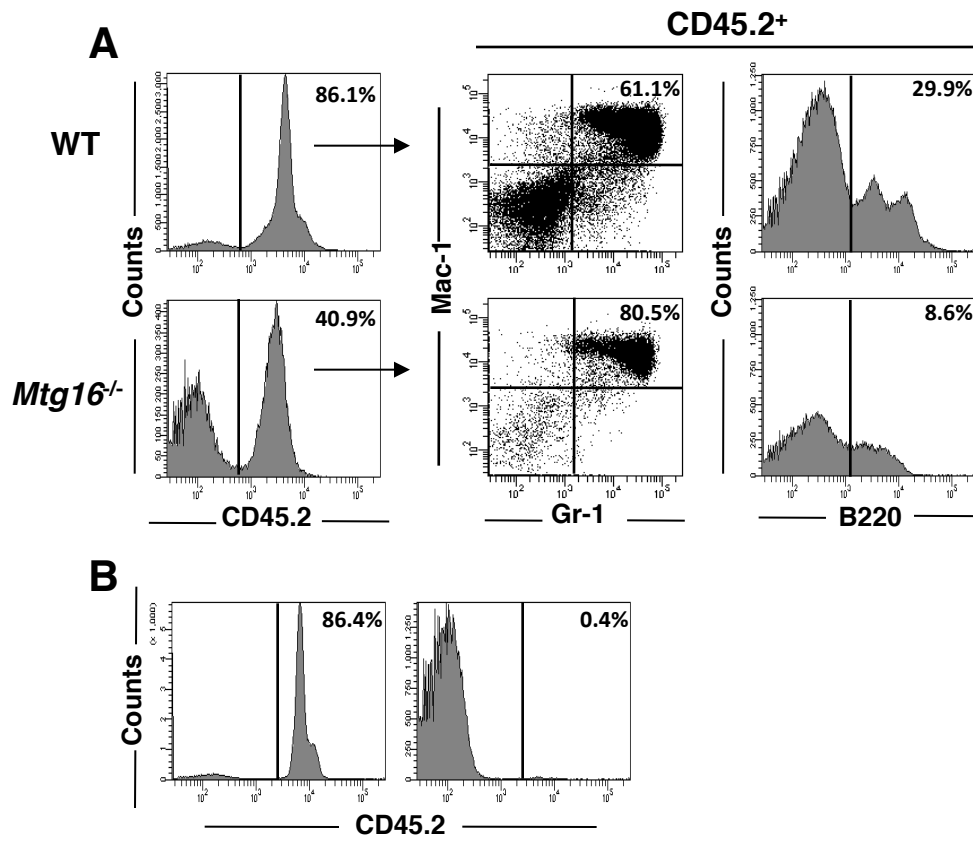

Figure S1

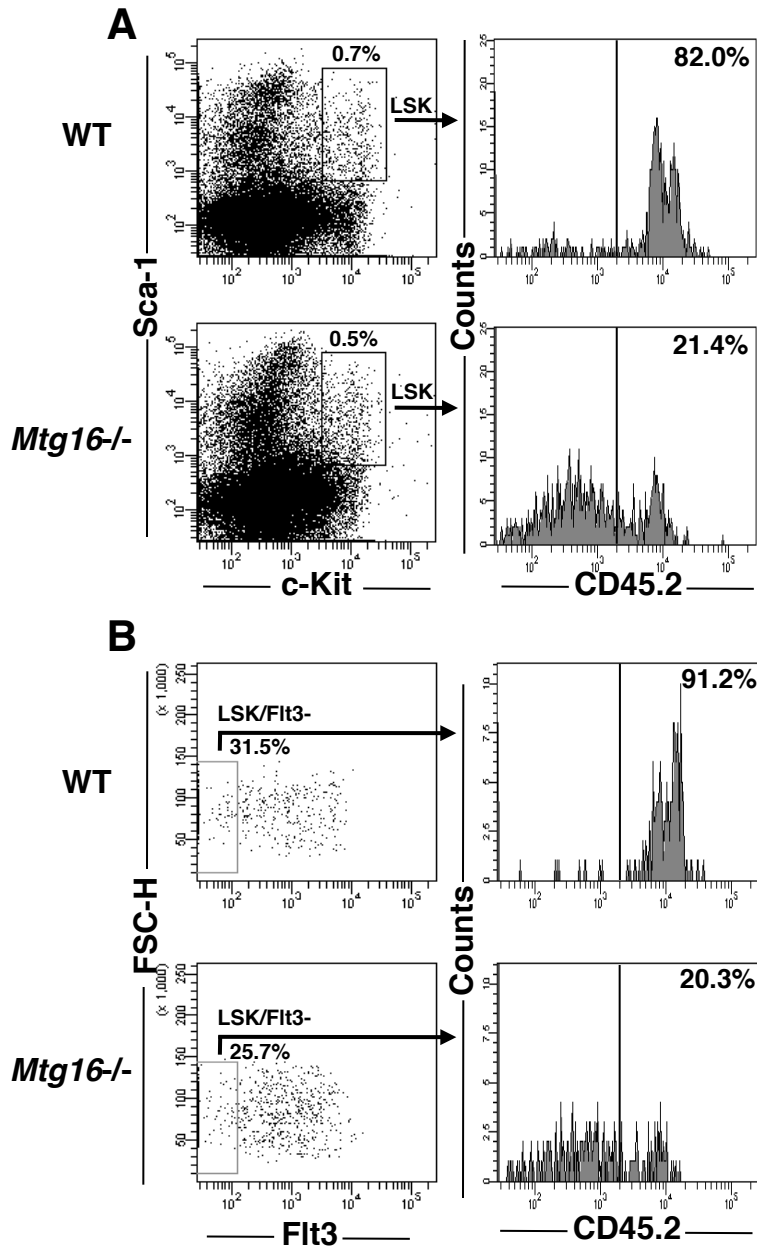

Figure S2

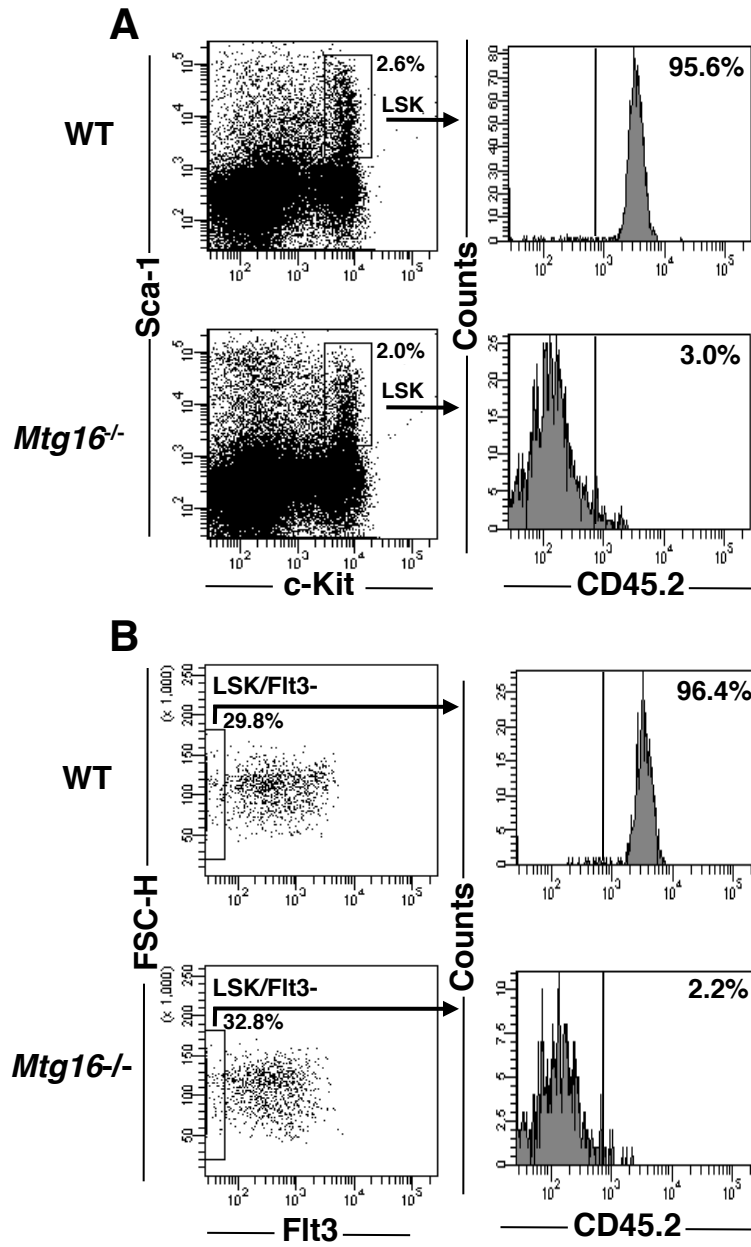

Figure S3

|                         | <b>Gapdh</b> | <b>Mtg16</b> | <b>Mtg8</b> | <b>Mtgr1</b> |
|-------------------------|--------------|--------------|-------------|--------------|
| <b>MEL</b>              | 13.1         | 18.9         | N/D         | 21.0         |
| <b>WT BM<br/>Stroma</b> | 13.1         | 26.9         | N/D         | 22.2         |
| <b>WT MEF</b>           | 13.1         | 27.6         | 21.9        | 21.5         |

**Figure S4**

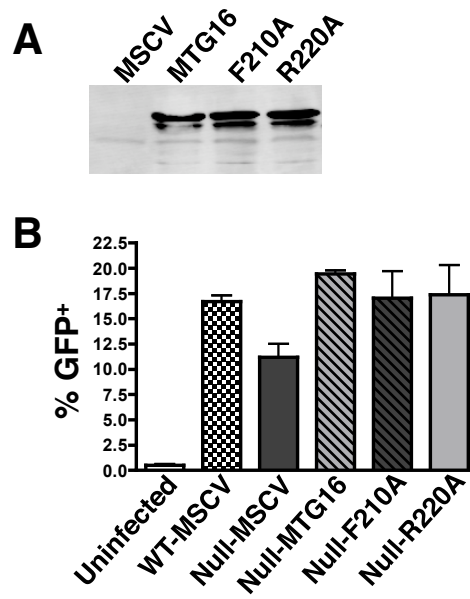

Figure S5



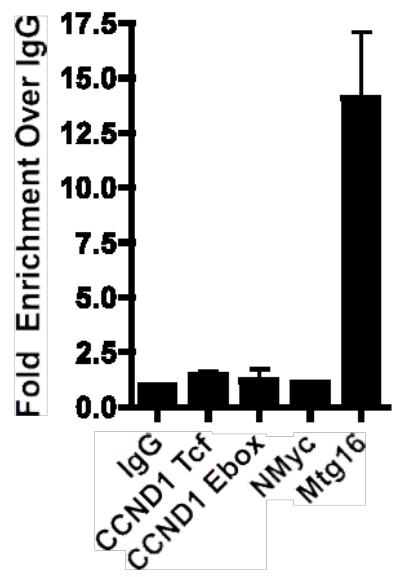

Figure S6

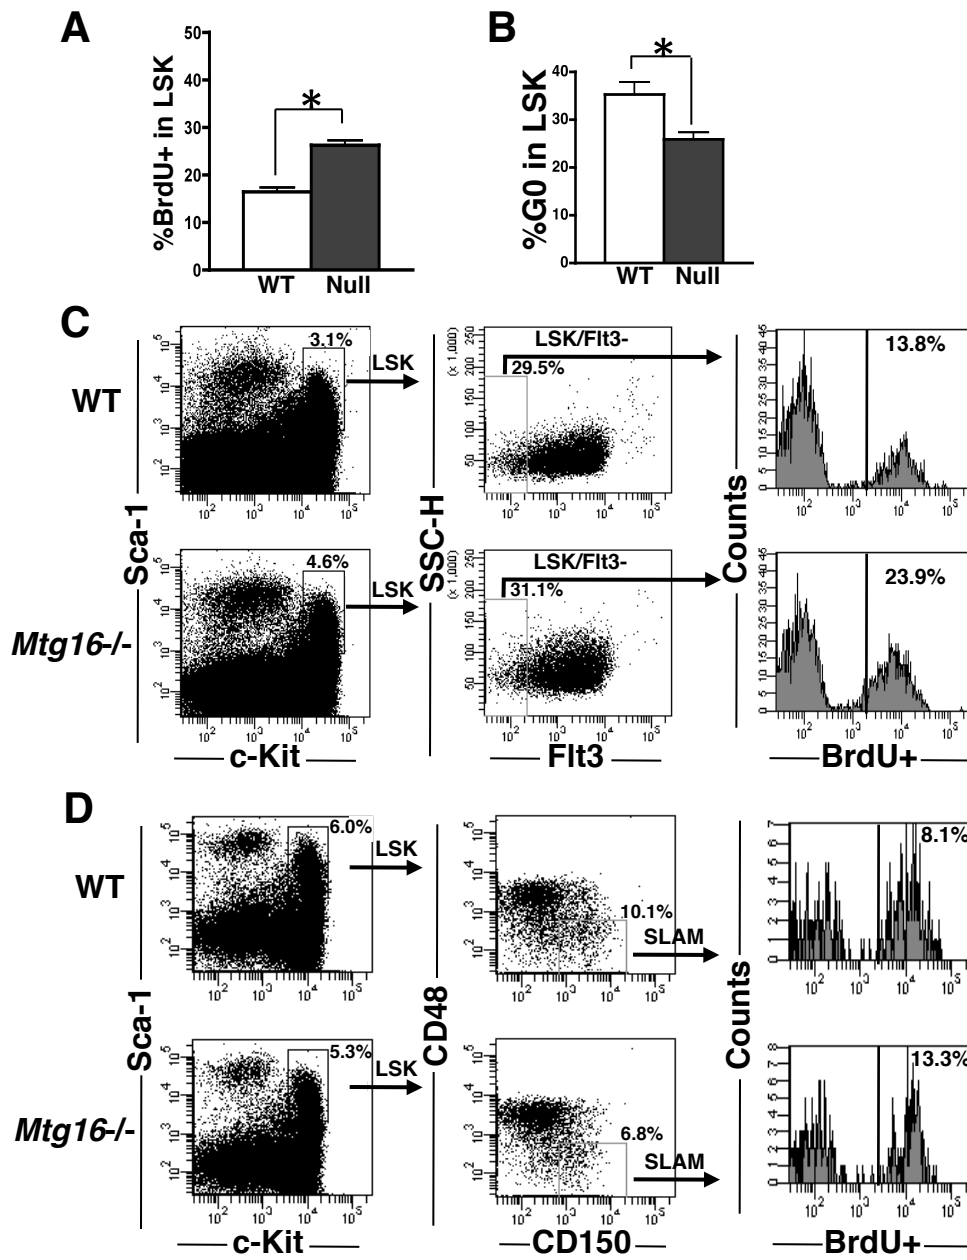

Figure S7

**Table S1. Up-regulated gene expression changes in *Mtg16*-null LSK cells.** An Excel spreadsheet containing the list of genes that were up-regulated at least 2-fold in *Mtg16*-null LSK cells with the average fold change between three separate microarrays displayed as a ratio to 1.

| <b>Systematic</b> | <b>Average Fold Change</b> | <b>Gene Symbol</b> | <b>Gene Name</b>                                                                      |
|-------------------|----------------------------|--------------------|---------------------------------------------------------------------------------------|
| 591371            | 27.88                      | Hspa1a             | heat shock protein 1A                                                                 |
| 345685            | 14.95                      | Centb1             | centaurin, beta 1                                                                     |
| 876101            | 13.89                      | Erdr1              | erythroid differentiation regulator 1                                                 |
| 821318            | 13.70                      | Ivns1abp           | influenza virus NS1A binding protein                                                  |
| 865694            | 12.87                      | Rrm1               | ribonucleotide reductase M1                                                           |
| 926125            | 11.97                      | Elav14             | ELAV (embryonic lethal, abnormal vision, <i>Drosophila</i> )-like 4 (Hu antigen D)    |
| 680809            | 10.59                      | Sla                | src-like adaptor                                                                      |
| 383491            | 9.10                       | Trpc4ap            | transient receptor potential cation channel, subfamily C, member 4 associated protein |
| 513587            | 9.04                       | Cd276              | CD276 antigen                                                                         |
| 406680            | 8.91                       | Hes1               | hairy and enhancer of split 1 ( <i>Drosophila</i> )                                   |
| 923224            | 8.86                       | Rgs1               | regulator of G-protein signaling 1                                                    |
| 450603            | 7.78                       | Stxbp4             | syntaxin binding protein 4                                                            |
| 331501            | 7.49                       | Pabpc1             | poly A binding protein, cytoplasmic 1                                                 |
| 600731            | 7.46                       | Hk3                | hexokinase 3                                                                          |
| 501289            | 7.31                       | Psen1              | presenilin 1                                                                          |
| 676713            | 7.12                       | Casp2              | caspase 2                                                                             |
| 511638            | 6.60                       | Id2                | inhibitor of DNA binding 2                                                            |
| 852613            | 6.43                       | Ccl3               | chemokine (C-C motif) ligand 3                                                        |
| 798198            | 6.37                       | Ddx6               | DEAD (Asp-Glu-Ala-Asp) box polypeptide 6                                              |
| 436322            | 6.34                       | Calcr1             | calcitonin receptor-like                                                              |
| 408476            | 6.34                       | Ahcyl1             | S-adenosylhomocysteine hydrolase-like 1                                               |
| 492624            | 6.33                       | Ccl4               | chemokine (C-C motif) ligand 4                                                        |
| 349496            | 6.11                       | Gem                | GTP binding protein (gene overexpressed in skeletal muscle)                           |
| 907300            | 5.62                       | Id1                | inhibitor of DNA binding 1                                                            |
| 671981            | 5.60                       | Clec4e             | C-type lectin domain family 4, member e                                               |
| 499148            | 5.51                       | Olfir632           | olfactory receptor 632                                                                |
| 451340            | 5.36                       | Gdf3               | growth differentiation factor 3                                                       |
| 525210            | 5.29                       | Pik3cd             | phosphatidylinositol 3-kinase catalytic delta polypeptide                             |

|        |      |               |                                                                                                     |
|--------|------|---------------|-----------------------------------------------------------------------------------------------------|
| 437853 | 5.23 | Gsk3b         | glycogen synthase kinase 3 beta                                                                     |
| 336985 | 5.12 | Angpt1        | angiopoietin 1                                                                                      |
| 605820 | 5.11 | Rps13         | ribosomal protein S13                                                                               |
| 532970 | 4.78 | Smc11         | SMC (structural maintenance of chromosomes 1)-like 1 ( <i>S. cerevisiae</i> )                       |
| 564553 | 4.70 | Il8rb         | interleukin 8 receptor, beta                                                                        |
| 585703 | 4.69 | Def6          | differentially expressed in FDCP 6                                                                  |
| 930937 | 4.69 | Spo11         | sporulation protein, meiosis-specific, SPO11 homolog ( <i>S. cerevisiae</i> )                       |
| 298459 | 4.67 | Chd4          | chromodomain helicase DNA binding protein 4                                                         |
| 486725 | 4.66 | Hcls1         | hematopoietic cell specific Lyn substrate 1                                                         |
| 583682 | 4.61 | Gpr128        | G protein-coupled receptor 128                                                                      |
| 650895 | 4.59 | Serpin10      | serine (or cysteine) peptidase inhibitor, clade B (ovalbumin), member 10                            |
| 740005 | 4.45 | Hbb-b2 Hbb-b1 | hemoglobin, beta adult minor chain hemoglobin beta chain complex hemoglobin, beta adult major chain |
| 668771 | 4.44 | Itih5         | inter-alpha (globulin) inhibitor H5                                                                 |
| 763662 | 4.44 | Senp1         | SUMO1/sentrin specific peptidase 1                                                                  |
| 430677 | 4.40 | Gria2         | glutamate receptor, ionotropic, AMPA2 (alpha 2)                                                     |
| 875407 | 4.32 | Dynll2        | dynein light chain LC8-type 2                                                                       |
| 417877 | 4.28 | Prkcq         | protein kinase C, theta                                                                             |
| 647221 | 4.22 | Sept 6        | septin 6                                                                                            |
| 674723 | 4.21 | Phlda1        | pleckstrin homology-like domain, family A, member 1                                                 |
| 308861 | 4.17 | Stxbp4        | syntaxin binding protein 4                                                                          |
| 673350 | 4.08 | Cdk2          | cyclin-dependent kinase 2                                                                           |
| 338672 | 4.03 | Tmem88        | transmembrane protein 88                                                                            |
| 921937 | 4.02 | Col18a1       | procollagen, type XVIII, alpha 1                                                                    |
| 903894 | 4.01 | Hnrpa3        | heterogeneous nuclear ribonucleoprotein A3                                                          |
| 697466 | 3.90 | Smarcc1       | SWI/SNF related, matrix associated, actin dependent regulator of chromatin, subfamily c, member 1   |
| 932068 | 3.88 | Chga          | chromogranin A                                                                                      |
| 551351 | 3.86 | Cox4i2        | cytochrome c oxidase subunit IV isoform 2                                                           |
| 313808 | 3.86 | Rbbp8         | retinoblastoma binding protein 8                                                                    |
| 742622 | 3.83 | Dusp2         | dual specificity phosphatase 2                                                                      |
| 743607 | 3.81 | Socs3         | suppressor of cytokine signaling 3                                                                  |
| 528830 | 3.80 | Arhgef2       | rho/rac guanine nucleotide exchange factor (GEF) 2                                                  |
| 419506 | 3.79 | Dcx           | doublecortin                                                                                        |
| 397393 | 3.79 | Ccng2         | cyclin G2                                                                                           |
| 434575 | 3.76 | Cbx3          | chromobox homolog 3 ( <i>Drosophila</i> HP1 gamma)                                                  |
| 635231 | 3.74 | Man2b1        | mannosidase 2, alpha B1                                                                             |
| 609659 | 3.71 | Ybx1          | Y box protein 1                                                                                     |

|        |      |          |                                                                    |
|--------|------|----------|--------------------------------------------------------------------|
| 458649 | 3.70 | Nbeal2   | neurobeachin-like 2                                                |
| 331404 | 3.70 | Dvl2     | dishevelled 2, dsh homolog (Drosophila)                            |
| 599323 | 3.65 | Atp2a3   | ATPase, Ca <sup>++</sup> transporting, ubiquitous                  |
| 367849 | 3.62 | Bpgm     | 2,3-bisphosphoglycerate mutase                                     |
| 522440 | 3.58 | Rutbc2   | RUN and TBC1 domain containing 2                                   |
| 370198 | 3.58 | Chchd2   | coiled-coil-helix-coiled-coil-helix domain containing 2            |
| 609379 | 3.58 | Crkrs    | Cdc2-related kinase, arginine/serine-rich                          |
| 587320 | 3.56 | Tmprss4  | transmembrane protease, serine 4                                   |
| 550354 | 3.55 | Phip     | pleckstrin homology domain interacting protein                     |
| 911717 | 3.53 | Slc6a15  | solute carrier family 6 (neurotransmitter transporter), member 15  |
| 584535 | 3.53 | Fmo5     | flavin containing monooxygenase 5                                  |
| 423512 | 3.52 | Runx1    | runt related transcription factor 1                                |
| 705434 | 3.48 | Alx3     | aristaless 3                                                       |
| 432495 | 3.44 | Slc39a9  | solute carrier family 39 (zinc transporter), member 9              |
| 602563 | 3.43 | Hspa12b  | heat shock protein 12B                                             |
| 890999 | 3.42 | Zbtb11   | zinc finger and BTB domain containing 11                           |
| 383002 | 3.42 | Prap1    | proline-rich acidic protein 1                                      |
| 855018 | 3.41 | Jak2     | Janus kinase 2                                                     |
| 568272 | 3.40 | Top2b    | topoisomerase (DNA) II beta                                        |
| 374634 | 3.36 | Tec      | cytoplasmic tyrosine kinase, Dscr28C related (Drosophila)          |
| 509058 | 3.33 | Cebpz    | CCAAT/enhancer binding protein zeta                                |
| 489532 | 3.32 | Stat3    | signal transducer and activator of transcription 3                 |
| 463565 | 3.30 | Fos      | FBJ osteosarcoma oncogene                                          |
| 520422 | 3.26 | Hdgfrp3  | hepatoma-derived growth factor, related protein 3                  |
| 662485 | 3.25 | Rasd1    | RAS, dexamethasone-induced 1                                       |
| 477242 | 3.21 | Pdcd1lg2 | programmed cell death 1 ligand 2                                   |
| 706854 | 3.20 | Add1     | adducin 1 (alpha)                                                  |
| 807992 | 3.20 | Ddx27    | DEAD (Asp-Glu-Ala-Asp) box polypeptide 27                          |
| 858127 | 3.20 | Arhgap25 | Rho GTPase activating protein 25                                   |
| 360890 | 3.18 | Tnrc6b   | trinucleotide repeat containing 6b                                 |
| 700170 | 3.18 | Tsc22d3  | TSC22 domain family 3                                              |
| 805305 | 3.15 | Grid1    | glutamate receptor, ionotropic, delta 1                            |
| 657515 | 3.14 | Acvr1b   | activin A receptor, type 1B                                        |
| 367379 | 3.14 | Trpc6    | transient receptor potential cation channel, subfamily C, member 6 |
| 684760 | 3.14 | Spats1   | spermatogenesis associated, serine-rich 1                          |
| 428331 | 3.13 | Gpr43    | G protein-coupled receptor 43                                      |

|        |      |           |                                                                           |
|--------|------|-----------|---------------------------------------------------------------------------|
| 519556 | 3.13 | Itga9     | integrin alpha 9                                                          |
| 312249 | 3.08 | Acox1     | acyl-Coenzyme A oxidase 1, palmitoyl                                      |
| 639094 | 3.08 | Gimap7    | GTPase, IMAP family member 7                                              |
| 571155 | 3.07 | Fmn2      | formin 2                                                                  |
| 726308 | 3.07 | Klhl24    | kelch-like 24 (Drosophila)                                                |
| 701423 | 3.06 | Irf6      | interferon regulatory factor 6                                            |
| 679840 | 3.05 | Myom1     | myomesin 1                                                                |
| 646764 | 3.03 | Pik3ap1   | phosphoinositide-3-kinase adaptor protein 1                               |
| 905471 | 3.02 | Ier3      | immediate early response 3                                                |
| 705438 | 3.02 | Slc16a9   | solute carrier family 16 (monocarboxylic acid transporters), member 9     |
| 508929 | 3.00 | Txndc14   | thioredoxin domain containing 14                                          |
| 627739 | 2.96 | Impact    | imprinted and ancient                                                     |
| 769774 | 2.95 | Rps6ka6   | ribosomal protein S6 kinase polypeptide 6                                 |
| 656054 | 2.95 | Malat1    | metastasis associated lung adenocarcinoma transcript 1 (non-coding RNA)   |
| 734593 | 2.95 | Taf15     | TAF15 RNA polymerase II, TATA box binding protein (TBP)-associated factor |
| 558144 | 2.94 | Gimap6    | GTPase, IMAP family member 6                                              |
| 367319 | 2.94 | Bat3      | HLA-B-associated transcript 3                                             |
| 470968 | 2.92 | Serpina3k | serine (or cysteine) peptidase inhibitor, clade A, member 3K              |
| 479998 | 2.91 | Ehd3      | EH-domain containing 3                                                    |
| 864257 | 2.90 | Csen      | calnenilin, presenilin binding protein, EF hand transcription factor      |
| 769260 | 2.90 | Pcf11     | cleavage and polyadenylation factor subunit homolog (S. cerevisiae)       |
| 788428 | 2.90 | Zmym6     | zinc finger, MYM-type 6                                                   |
| 450169 | 2.90 | Diap1     | diaphanous homolog 1 (Drosophila)                                         |
| 302054 | 2.90 | Rapgef5   | Rap guanine nucleotide exchange factor (GEF) 5                            |
| 911454 | 2.89 | Fgd5      | FYVE, RhoGEF and PH domain containing 5                                   |
| 305716 | 2.89 | Eif3s10   | eukaryotic translation initiation factor 3, subunit 10 (theta)            |
| 620558 | 2.89 | Smad1     | MAD homolog 1 (Drosophila)                                                |
| 892217 | 2.87 | Rab5b     | RAB5B, member RAS oncogene family                                         |
| 687333 | 2.87 | Prkd2     | protein kinase D2                                                         |
| 455664 | 2.86 | Eprs      | glutamyl-prolyl-tRNA synthetase                                           |
| 698480 | 2.85 | Slmap     | sarcolemma associated protein                                             |
| 831009 | 2.82 | Bpil2     | bactericidal/permeability-increasing protein-like 2                       |
| 804642 | 2.82 | Mgea5     | meningioma expressed antigen 5 (hyaluronidase)                            |
| 489010 | 2.81 | Hmgb1     | high mobility group box 1                                                 |
| 778661 | 2.81 | Esr1      | estrogen receptor 1 (alpha)                                               |
| 851737 | 2.80 | Arhgap30  | Rho GTPase activating protein 30                                          |

|        |      |          |                                                                              |
|--------|------|----------|------------------------------------------------------------------------------|
| 309811 | 2.79 | E2f2     | E2F transcription factor 2                                                   |
| 656444 | 2.79 | Zc3h7a   | zinc finger CCCH type containing 7 A                                         |
| 833914 | 2.78 | Tcfcp2l1 | transcription factor CP2-like 1                                              |
| 871459 | 2.77 | Git2     | G protein-coupled receptor kinase-interactor 2                               |
| 807687 | 2.77 | Mylk     | myosin, light polypeptide kinase                                             |
| 466200 | 2.76 | Bfsp2    | beaded filament structural protein 2, phakinin                               |
| 900558 | 2.75 | Hnrpa3   | heterogeneous nuclear ribonucleoprotein A3                                   |
| 375429 | 2.74 | Lamb3    | laminin, beta 3                                                              |
| 536894 | 2.74 | Zfp651   | zinc finger protein 651                                                      |
| 404203 | 2.74 | Gimap8   | GTPase, IMAP family member 8                                                 |
| 815203 | 2.73 | Sdccag3  | serologically defined colon cancer antigen 3                                 |
| 802636 | 2.73 | Tcfec    | transcription factor EC                                                      |
| 920680 | 2.73 | Clnk     | cytokine-dependent hematopoietic cell linker                                 |
| 358745 | 2.72 | Dhx9     | DEAH (Asp-Glu-Ala-His) box polypeptide 9                                     |
| 919347 | 2.71 | Nrarp    | Notch-regulated ankyrin repeat protein                                       |
| 614999 | 2.70 | Slbp     | stem-loop binding protein                                                    |
| 684806 | 2.70 | Cnd1     | cyclin D1                                                                    |
| 317030 | 2.69 | Mmrn1    | multimerin 1                                                                 |
| 436792 | 2.69 | Prpf38b  | PRP38 pre-mRNA processing factor 38 (yeast) domain containing B              |
| 390678 | 2.68 | Mctp1    | multiple C2 domains, transmembrane 1                                         |
| 823093 | 2.68 | Rel      | reticuloendotheliosis oncogene                                               |
| 744282 | 2.66 | Dnmt1    | DNA methyltransferase (cytosine-5) 1                                         |
| 843663 | 2.65 | Six6os1  | Six6 opposite strand transcript 1                                            |
| 340636 | 2.64 | Il10ra   | interleukin 10 receptor, alpha                                               |
| 928412 | 2.63 | Esam1    | endothelial cell-specific adhesion molecule                                  |
| 431530 | 2.63 | Myct1    | myc target 1                                                                 |
| 355859 | 2.61 | Mycn     | v-myc myelocytomatosis viral related oncogene, neuroblastoma derived (avian) |
| 619823 | 2.60 | Syt15    | synaptotagmin XV                                                             |
| 349030 | 2.57 | Colla2   | procollagen, type I, alpha 2                                                 |
| 596178 | 2.57 | Irf2     | interferon regulatory factor 2                                               |
| 788977 | 2.56 | Cabyr    | calcium-binding tyrosine-(Y)-phosphorylation regulated (fibrousheathin 2)    |
| 468532 | 2.56 | Spnb2    | spectrin beta 2                                                              |
| 549481 | 2.56 | Shank3   | SH3/ankyrin domain gene 3                                                    |
| 355535 | 2.56 | Ctla2b   | cytotoxic T lymphocyte-associated protein 2 beta                             |
| 494195 | 2.55 | Peg13    | paternally expressed 13                                                      |
| 704142 | 2.55 | Thoc4    | THO complex 4                                                                |

|        |      |         |                                                                                        |
|--------|------|---------|----------------------------------------------------------------------------------------|
| 514678 | 2.54 | Ppic    | peptidylprolyl isomerase C                                                             |
| 658889 | 2.54 | Tuba8   | tubulin, alpha 8                                                                       |
| 794789 | 2.54 | Tle6    | transducin-like enhancer of split 6, homolog of Drosophila E(spl)                      |
| 826056 | 2.53 | Cflar   | CASP8 and FADD-like apoptosis regulator                                                |
| 346781 | 2.53 | Asah3l  | N-acylsphingosine amidohydrolase 3-like                                                |
| 920226 | 2.53 | Ptk7    | PTK7 protein tyrosine kinase 7                                                         |
| 385815 | 2.53 | Eld1    | EGF, latrophilin seven transmembrane domain containing 1                               |
| 652183 | 2.52 | Aggf1   | angiogenic factor with G patch and FHA domains 1                                       |
| 534872 | 2.51 | Mdga1   | MAM domain containing glycosylphosphatidylinositol anchor 1                            |
| 831158 | 2.50 | Ltc4s   | leukotriene C4 synthase                                                                |
| 836251 | 2.50 | Ppcdc   | phosphopantothenoylecysteine decarboxylase                                             |
| 458888 | 2.50 | Nedd9   | neural precursor cell expressed, developmentally down-regulated gene 9                 |
| 906691 | 2.49 | Gfra1   | glial cell line derived neurotrophic factor family receptor alpha 1                    |
| 537416 | 2.49 | Ctdspl  | CTD (carboxy-terminal domain, RNA polymerase II, polypeptide A) small phosphatase-like |
| 910644 | 2.48 | Il4     | interleukin 4                                                                          |
| 437562 | 2.47 | Bcr     | breakpoint cluster region homolog                                                      |
| 477323 | 2.47 | Mbd2    | methyl-CpG binding domain protein 2                                                    |
| 462535 | 2.46 | Il21r   | interleukin 21 receptor                                                                |
| 818660 | 2.46 | Zfp503  | zinc finger protein 503                                                                |
| 722246 | 2.46 | Bcl2l2  | Bcl2-like 2                                                                            |
| 802691 | 2.46 | Cdc14b  | CDC14 cell division cycle 14 homolog B (S. cerevisiae)                                 |
| 486066 | 2.45 | Csf2rb2 | colony stimulating factor 2 receptor, beta 2, low-affinity (granulocyte-macrophage)    |
| 662835 | 2.45 | Hdgfrp3 | hepatoma-derived growth factor, related protein 3                                      |
| 380532 | 2.44 | Maff    | v-maf musculoaponeurotic fibrosarcoma oncogene family, protein F (avian)               |
| 496876 | 2.44 | Dnajb12 | DnaJ (Hsp40) homolog, subfamily B, member 12                                           |
| 546595 | 2.42 | Zbtb20  | zinc finger and BTB domain containing 20                                               |
| 698766 | 2.41 | Hdgfrp3 | hepatoma-derived growth factor, related protein 3                                      |
| 713990 | 2.41 | Clk1    | CDC-like kinase 1                                                                      |
| 502257 | 2.41 | Higd1a  | HIG1 domain family, member 1A                                                          |
| 892920 | 2.40 | Eif3s10 | eukaryotic translation initiation factor 3, subunit 10 (theta)                         |
| 517180 | 2.40 | Tek     | endothelial-specific receptor tyrosine kinase                                          |
| 879746 | 2.40 | Ptgir   | prostaglandin I receptor (IP)                                                          |
| 734020 | 2.40 | Myo18a  | myosin XVIIIa                                                                          |
| 932163 | 2.40 | Capn3   | calpain 3                                                                              |
| 404373 | 2.39 | Nnt     | nicotinamide nucleotide transhydrogenase                                               |
| 507240 | 2.39 | Sox12   | SRY-box containing gene 12                                                             |



|        |      |           |                                                                                                              |
|--------|------|-----------|--------------------------------------------------------------------------------------------------------------|
| 387650 | 2.38 | Nipbl     | Nipped-B homolog (Drosophila)                                                                                |
| 831914 | 2.38 | Mrgpra1   | MAS-related GPR, member A1                                                                                   |
| 316200 | 2.37 | Kiss1     | KiSS-1 metastasis-suppressor                                                                                 |
| 536933 | 2.36 | Dock8     | dedicator of cytokinesis 8                                                                                   |
| 890654 | 2.35 | Esco1     | establishment of cohesion 1 homolog 1 (S. cerevisiae)                                                        |
| 425838 | 2.35 | Rsnl2     | restin-like 2                                                                                                |
| 841070 | 2.35 | Gtpbp2    | GTP binding protein 2                                                                                        |
| 624929 | 2.34 | Cxcr3     | chemokine (C-X-C motif) receptor 3                                                                           |
| 404045 | 2.34 | Spry1     | sprouty homolog 1 (Drosophila)                                                                               |
| 872855 | 2.33 | Cdc27     | cell division cycle 27 homolog (S. cerevisiae)                                                               |
| 441024 | 2.33 | Usp53     | ubiquitin specific peptidase 53                                                                              |
| 569692 | 2.33 | Cfc1      | cripto, FRL-1, cryptic family 1                                                                              |
| 322891 | 2.33 | Jph4      | junctionophilin 4                                                                                            |
| 576185 | 2.33 | Wasf2     | WAS protein family, member 2                                                                                 |
| 861636 | 2.32 | Capn5     | calpain 5                                                                                                    |
| 300547 | 2.32 | Pde4b     | phosphodiesterase 4B, cAMP specific                                                                          |
| 513596 | 2.32 | Sctr      | secretin receptor                                                                                            |
| 556869 | 2.32 | Scarf1    | scavenger receptor class F, member 1                                                                         |
| 803580 | 2.30 | Syt14     | synaptotagmin-like 4                                                                                         |
| 841161 | 2.29 | Cpd       | carboxypeptidase D                                                                                           |
| 487748 | 2.29 | Bach2     | BTB and CNC homology 2                                                                                       |
| 385124 | 2.29 | Ptpre     | protein tyrosine phosphatase, receptor type, C                                                               |
| 341768 | 2.28 | Snx10     | sorting nexin 10                                                                                             |
| 385469 | 2.28 | St6galnac | ST6 (alpha-N-acetyl-neuraminy-2,3-beta-galactosyl-1,3)-N-acetylgalactosaminide alpha-2,6-sialyltransferase 6 |
| 912603 | 2.26 | Pcbp4     | poly(rC) binding protein 4                                                                                   |
| 928178 | 2.25 | Dlk1      | delta-like 1 homolog (Drosophila)                                                                            |
| 552621 | 2.25 | Bach1     | BTB and CNC homology 1                                                                                       |
| 664685 | 2.24 | Ebi3      | Epstein-Barr virus induced gene 3                                                                            |
| 406238 | 2.24 | Pik3r1    | phosphatidylinositol 3-kinase, regulatory subunit, polypeptide 1 (p85 alpha)                                 |
| 347771 | 2.24 | Lonrf1    | LON peptidase N-terminal domain and ring finger 1                                                            |
| 364376 | 2.24 | Wars2     | tryptophanyl tRNA synthetase 2 (mitochondrial)                                                               |
| 366707 | 2.23 | Sall2     | sal-like 2 (Drosophila)                                                                                      |
| 612691 | 2.23 | Gadd45b   | growth arrest and DNA-damage-inducible 45 beta                                                               |
| 759808 | 2.23 | Hist1h2ac | histone 1, H2ac                                                                                              |
| 561615 | 2.23 | Efhc2     | EF-hand domain (C-terminal) containing 2                                                                     |
| 926414 | 2.23 | Nsg2      | neuron specific gene family member 2                                                                         |

|        |      |          |                                                              |
|--------|------|----------|--------------------------------------------------------------|
| 412516 | 2.23 | Zfp612   | zinc finger protein 612                                      |
| 517043 | 2.23 | Ldhd     | lactate dehydrogenase D                                      |
| 443721 | 2.23 | Hhex     | hematopoietically expressed homeobox                         |
| 712701 | 2.22 | Rasgef1b | RasGEF domain family, member 1B                              |
| 368174 | 2.22 | Gchfr    | GTP cyclohydrolase I feedback regulator                      |
| 758704 | 2.22 | Xpo7     | exportin 7                                                   |
| 847906 | 2.22 | Raf1     | v-raf-leukemia viral oncogene 1                              |
| 673285 | 2.22 | Clqtnf6  | Clq and tumor necrosis factor related protein 6              |
| 766293 | 2.21 | Hist1h4j | histone 1, H4j                                               |
| 349550 | 2.21 | Hip1     | huntingtin interacting protein 1                             |
| 852800 | 2.21 | Htatsf1  | HIV TAT specific factor 1                                    |
| 318395 | 2.21 | Wfdc2    | WAP four-disulfide core domain 2                             |
| 893571 | 2.20 | Ptprz1   | protein tyrosine phosphatase, receptor type Z, polypeptide 1 |
| 631440 | 2.20 | Cdk5r2   | cyclin-dependent kinase 5, regulatory subunit 2 (p39)        |
| 921190 | 2.20 | Hemgn    | hemogen                                                      |
| 803407 | 2.19 | Otos     | otospiralin                                                  |
| 452162 | 2.19 | Za20d2   | zinc finger, A20 domain containing 2                         |
| 898183 | 2.19 | Gpi1     | glucose phosphate isomerase 1                                |
| 622680 | 2.19 | Pthr1    | parathyroid hormone receptor 1                               |
| 413018 | 2.19 | Nox4     | NADPH oxidase 4                                              |
| 648047 | 2.18 | Zfp469   | zinc finger protein 469                                      |
| 646744 | 2.18 | Lemd3    | LEM domain containing 3                                      |
| 595676 | 2.16 | Fubp1    | far upstream element (FUSE) binding protein 1                |
| 906895 | 2.16 | Gpc2     | glypican 2 (cerebroglycan)                                   |
| 926998 | 2.16 | Rab38    | Rab38, member of RAS oncogene family                         |
| 832235 | 2.15 | Ifnz     | interferon zeta                                              |
| 753913 | 2.15 | Pcdhb22  | protocadherin beta 22                                        |
| 312356 | 2.14 | Leng8    | leukocyte receptor cluster (LRC) member 8                    |
| 604718 | 2.14 | Slco4a1  | solute carrier organic anion transporter family, member 4a1  |
| 368164 | 2.14 | Atp10a   | ATPase, class V, type 10A                                    |
| 544312 | 2.13 | Zc3h11a  | zinc finger CCCH type containing 11A                         |
| 433645 | 2.12 | Ncoa7    | nuclear receptor coactivator 7                               |
| 411745 | 2.12 | Itpkb    | inositol 1,4,5-trisphosphate 3-kinase B                      |
| 755587 | 2.10 | Ckap4    | cytoskeleton-associated protein 4                            |
| 519196 | 2.10 | Myl7     | myosin, light polypeptide 7, regulatory                      |
| 540897 | 2.09 | Rexo1    | REX1, RNA exonuclease 1 homolog (S. cerevisiae)              |

|        |      |          |                                                                                              |
|--------|------|----------|----------------------------------------------------------------------------------------------|
| 462366 | 2.09 | Sorcs2   | sortilin-related VPS10 domain containing receptor 2                                          |
| 926484 | 2.08 | Cit      | citron                                                                                       |
| 754351 | 2.08 | Arid5a   | AT rich interactive domain 5A (Mrfl like)                                                    |
| 463172 | 2.07 | Ppp1r16b | protein phosphatase 1, regulatory (inhibitor) subunit 16B                                    |
| 359843 | 2.07 | Itsn2    | intersectin 2                                                                                |
| 734718 | 2.06 | Troap    | trophinin associated protein                                                                 |
| 432900 | 2.05 | Eif4ebp1 | eukaryotic translation initiation factor 4E binding protein 1                                |
| 930564 | 2.05 | Vat1     | vesicle amine transport protein 1 homolog (T californica)                                    |
| 653387 | 2.04 | VeZF1    | vascular endothelial zinc finger 1                                                           |
| 884651 | 2.04 | Armc2    | armadillo repeat containing 2                                                                |
| 449492 | 2.04 | Trib3    | tribbles homolog 3 (Drosophila)                                                              |
| 829781 | 2.03 | Psma8    | proteasome (prosome, macropain) subunit, alpha type, 8                                       |
| 851555 | 2.03 | Lmo1     | LIM domain only 1                                                                            |
| 492366 | 2.03 | Il1r1    | interleukin 1 receptor, type I                                                               |
| 364885 | 2.02 | Sh3yl1   | Sh3 domain YSC-like 1                                                                        |
| 335445 | 2.02 | Col4a1   | procollagen, type IV, alpha 1                                                                |
| 516673 | 2.02 | Zfp326   | zinc finger protein 326                                                                      |
| 577001 | 2.02 | Zfp608   | zinc finger protein 608 RIKEN cDNA D430007A19 gene                                           |
| 661508 | 2.02 | Srms     | src-related kinase lacking C-terminal regulatory tyrosine and N-terminal myristylation sites |
| 905489 | 2.01 | Pcmt2    | protein-L-isoaspartate (D-aspartate) O-methyltransferase domain containing 2                 |
| 525062 | 2.01 | Zfp397   | zinc finger protein 397                                                                      |
| 852065 | 2.01 | Rhob     | ras homolog gene family, member B                                                            |
| 691622 | 2.00 | Nr2c2    | nuclear receptor subfamily 2, group C, member 2                                              |

**Table S2. Down-regulated gene expression changes in *Mtg16*-null LSK cells.** An Excel spreadsheet containing the list of genes that were down-regulated at least 2-fold in *Mtg16*-null LSK cells with the average fold change between three separate microarrays displayed as a ratio to 1.

| Systematic | Average Fold Change | Gene Symbol | Gene Name                                                                                                                                                                        |
|------------|---------------------|-------------|----------------------------------------------------------------------------------------------------------------------------------------------------------------------------------|
| 932062     | 58.69               | Car1        | carbonic anhydrase 1                                                                                                                                                             |
| 618089     | 58.04               | Car1        | carbonic anhydrase 1                                                                                                                                                             |
| 909884     | 57.65               | Igl-V1      | immunoglobulin lambda chain, variable 1 RIKEN cDNA 2010309G21 gene                                                                                                               |
| 538665     | 55.63               | Igk-V38     | immunoglobulin kappa chain variable 38(V38)                                                                                                                                      |
| 910033     | 29.09               | Igk-V8      | immunoglobulin kappa chain variable 8 (V8) immunoglobulin kappa chain, constant region immunoglobulin kappa chain variable 21 (V21) immunoglobulin kappa chain variable 28 (V28) |
| 823783     | 25.02               | Igk-V28     | immunoglobulin kappa chain variable 28 (V28)                                                                                                                                     |
| 590082     | 20.87               | Igk-V32     | immunoglobulin kappa chain variable 32 (V32)                                                                                                                                     |
| 749478     | 18.74               | Igj         | immunoglobulin joining chain                                                                                                                                                     |
| 738417     | 17.16               | Igh-1a      | immunoglobulin heavy chain 1a (serum IgG2a)                                                                                                                                      |
| 916906     | 14.19               | Mt1         | metallothionein 1                                                                                                                                                                |
| 869794     | 13.23               | Igk-V38     | immunoglobulin kappa chain variable 38(V38)                                                                                                                                      |
| 446685     | 12.30               | Rhag        | Rhesus blood group-associated A glycoprotein                                                                                                                                     |
| 652756     | 11.53               | Slc38a5     | solute carrier family 38, member 5                                                                                                                                               |
| 620526     | 11.29               | Hp          | haptoglobin                                                                                                                                                                      |
| 452867     | 10.80               | Igsf6       | immunoglobulin superfamily, member 6                                                                                                                                             |
| 549834     | 10.27               | Samd14      | sterile alpha motif domain containing 14                                                                                                                                         |
| 352835     | 8.97                | Prss34      | protease, serine, 34                                                                                                                                                             |
| 359954     | 8.92                | Aplp2       | amyloid beta (A4) precursor-like protein 2                                                                                                                                       |
| 899101     | 8.32                | Igh-VJ55    | immunoglobulin heavy chain (J558 family)                                                                                                                                         |
| 675426     | 8.23                | Igh-1a      | immunoglobulin heavy chain 1a (serum IgG2a)                                                                                                                                      |
| 926815     | 7.89                | Gpx7        | glutathione peroxidase 7                                                                                                                                                         |
| 831777     | 7.30                | Ela2        | elastase 2, neutrophil                                                                                                                                                           |
| 861056     | 7.27                | Rtn4r11     | reticulon 4 receptor-like 1                                                                                                                                                      |
| 596021     | 6.96                | IgM         | null                                                                                                                                                                             |
| 495283     | 6.60                | Ms4a4c      | membrane-spanning 4-domains, subfamily A, member 4C                                                                                                                              |
| 893766     | 6.60                | Igh-VJ55    | immunoglobulin heavy chain (J558 family)                                                                                                                                         |
| 460369     | 6.27                | Ly6c        | lymphocyte antigen 6 complex, locus C                                                                                                                                            |
| 771536     | 6.19                | Zfp336      | zinc finger protein 336                                                                                                                                                          |

|        |      |           |                                                                             |
|--------|------|-----------|-----------------------------------------------------------------------------|
| 396393 | 5.95 | Ly86      | lymphocyte antigen 86                                                       |
| 468149 | 5.91 | Chst1     | carbohydrate (keratan sulfate Gal-6) sulfotransferase 1                     |
| 917278 | 5.83 | Mt1       | metallothionein 1                                                           |
| 345690 | 5.80 | Irf7      | interferon regulatory factor 7                                              |
| 363757 | 5.77 | Epdr2     | ependymin related protein 2 (zebrafish)                                     |
| 579252 | 5.74 | Igh-4     | immunoglobulin heavy chain 4 (serum IgG1)                                   |
| 918570 | 5.65 | Epor      | erythropoietin receptor                                                     |
| 924562 | 5.50 | Oasl1     | 2'-5' oligoadenylate synthetase-like 1                                      |
| 648457 | 5.12 | Ms4a6c    | membrane-spanning 4-domains, subfamily A, member 6C                         |
| 538717 | 5.08 | Ifi27     | interferon, alpha-inducible protein 27                                      |
| 926789 | 4.94 | Uchl1     | ubiquitin carboxy-terminal hydrolase L1                                     |
| 894906 | 4.93 | Igh Igh-V | immunoglobulin heavy chain complex immunoglobulin heavy chain (J558 family) |
| 460106 | 4.93 | Igh       | immunoglobulin heavy chain complex                                          |
| 710465 | 4.87 | Wdfy1     | WD repeat and FYVE domain containing 1                                      |
| 907810 | 4.86 | Il17rb    | interleukin 17 receptor B                                                   |
| 574392 | 4.84 | Myef2     | myelin basic protein expression factor 2, repressor                         |
| 314636 | 4.75 | Sdpr      | serum deprivation response                                                  |
| 324309 | 4.69 | Parn      | poly(A)-specific ribonuclease (deadenylation nuclease)                      |
| 546299 | 4.60 | Slfn2     | schlafen 2                                                                  |
| 921083 | 4.50 | Clec2i    | C-type lectin domain family 2, member i                                     |
| 721190 | 4.44 | Nrp1      | neuropilin 1                                                                |
| 816794 | 4.44 | Chd7      | chromodomain helicase DNA binding protein 7                                 |
| 844589 | 4.36 | Slmap     | sarcolemma associated protein                                               |
| 544174 | 4.30 | P2ry1     | purinergic receptor P2Y, G-protein coupled 1                                |
| 320413 | 4.30 | Golph3    | golgi phosphoprotein 3                                                      |
| 833457 | 4.29 | Ifi44     | interferon-induced protein 44                                               |
| 339537 | 4.28 | Cks2      | CDC28 protein kinase regulatory subunit 2                                   |
| 811311 | 4.23 | S100a9    | S100 calcium binding protein A9 (calgranulin B)                             |
| 339582 | 4.16 | Igh-1a    | immunoglobulin heavy chain 1a (serum IgG2a)                                 |
| 902343 | 4.15 | Igh-VJ55  | immunoglobulin heavy chain (J558 family)                                    |
| 438565 | 4.02 | Trem3     | triggering receptor expressed on myeloid cells 3                            |
| 679113 | 4.02 | Abcb4     | ATP-binding cassette, sub-family B (MDR/TAP), member 4                      |
| 563904 | 3.99 | Slc12a4   | solute carrier family 12, member 4                                          |
| 680551 | 3.96 | Lmyc1     | lung carcinoma myc related oncogene 1                                       |
| 598980 | 3.87 | Nol10     | nucleolar protein 10                                                        |
| 829053 | 3.85 | Blnk      | B-cell linker                                                               |

|        |      |           |                                                                                |
|--------|------|-----------|--------------------------------------------------------------------------------|
| 344219 | 3.79 | Pon2      | paraoxonase 2                                                                  |
| 748865 | 3.76 | Rps6ka5   | ribosomal protein S6 kinase, polypeptide 5                                     |
| 383820 | 3.73 | Ccr2      | chemokine (C-C motif) receptor 2                                               |
| 907925 | 3.73 | Iigp1     | interferon inducible GTPase 1                                                  |
| 900801 | 3.72 | Kpna2     | karyopherin (importin) alpha 2                                                 |
| 638728 | 3.70 | Serpinf1  | serine (or cysteine) peptidase inhibitor, clade F, member 1                    |
| 403608 | 3.67 | Abca1     | ATP-binding cassette, sub-family A (ABC1), member 1                            |
| 619067 | 3.65 | Mcpt8     | mast cell protease 8                                                           |
| 776961 | 3.58 | Sez6l     | seizure related 6 homolog like                                                 |
| 793478 | 3.55 | Eif4ebp2  | eukaryotic translation initiation factor 4E binding protein 2                  |
| 757700 | 3.54 | Bdh       | 3-hydroxybutyrate dehydrogenase (heart, mitochondrial)                         |
| 753186 | 3.52 | Trim2     | tripartite motif protein 2                                                     |
| 381483 | 3.50 | Rhced     | Rhesus blood group CE and D                                                    |
| 726901 | 3.48 | Lcn2      | lipocalin 2                                                                    |
| 377864 | 3.46 | Ifitm6    | interferon induced transmembrane protein 6                                     |
| 585421 | 3.44 | Mmp19     | matrix metalloproteinase 19                                                    |
| 455840 | 3.38 | Mefv      | Mediterranean fever                                                            |
| 766141 | 3.37 | Zfp367    | zinc finger protein 367                                                        |
| 920113 | 3.36 | Slc7a5    | solute carrier family 7 (cationic amino acid transporter, y+ system), member 5 |
| 363102 | 3.35 | Trp53inp1 | tumor protein p53 inducible nuclear protein 2                                  |
| 551683 | 3.33 | Mpeg1     | macrophage expressed gene 1                                                    |
| 323576 | 3.33 | Bcl2l11   | BCL2-like 11 (apoptosis facilitator)                                           |
| 545933 | 3.32 | Ctsg      | cathepsin G                                                                    |
| 692827 | 3.30 | Rad23b    | RAD23b homolog (S. cerevisiae)                                                 |
| 316223 | 3.28 | ci12      | null                                                                           |
| 593035 | 3.28 | Dhx40     | DEAH (Asp-Glu-Ala-His) box polypeptide 40                                      |
| 409394 | 3.28 | Pfn4      | profilin family, member 4                                                      |
| 575878 | 3.27 | Cxcl9     | chemokine (C-X-C motif) ligand 9                                               |
| 460534 | 3.27 | Camsap1   | calmodulin regulated spectrin-associated protein 1-like 1                      |
| 451973 | 3.26 | Olfrl1214 | olfactory receptor 1214                                                        |
| 559153 | 3.24 | Chst2     | carbohydrate sulfotransferase 2                                                |
| 455908 | 3.24 | P2ry13    | purinergic receptor P2Y, G-protein coupled 13                                  |
| 666881 | 3.24 | Tcrg-C    | T-cell receptor gamma, constant region                                         |
| 574875 | 3.24 | Zfp37     | zinc finger protein 37                                                         |
| 843747 | 3.23 | Gna-rs1   | guanine nucleotide binding protein, related sequence 1                         |
| 899721 | 3.20 | Hspa9a    | heat shock protein 9A                                                          |

|        |      |          |                                                                                                       |
|--------|------|----------|-------------------------------------------------------------------------------------------------------|
| 894506 | 3.18 | Ublcp1   | ubiquitin-like domain containing CTD phosphatase 1                                                    |
| 344972 | 3.15 | Plxb2    | plexin B2                                                                                             |
| 888803 | 3.15 | Rbpms2   | RNA binding protein with multiple splicing 2                                                          |
| 642165 | 3.15 | Snx12    | sorting nexin 12                                                                                      |
| 628110 | 3.12 | Ascl2    | achaete-scute complex homolog-like 2 (Drosophila)                                                     |
| 585281 | 3.10 | Tmem48   | transmembrane protein 48                                                                              |
| 848818 | 3.10 | Xrcc2    | X-ray repair complementing defective repair in Chinese hamster cells 2                                |
| 653727 | 3.09 | Tle1     | transducin-like enhancer of split 1, homolog of Drosophila E(spl)                                     |
| 355486 | 3.08 | Vcl      | vinculin                                                                                              |
| 335109 | 3.08 | Trpm2    | transient receptor potential cation channel, subfamily M, member 2                                    |
| 615460 | 3.07 | Lancl2   | LanC (bacterial lantibiotic synthetase component C)-like 2                                            |
| 548224 | 3.07 | Ebi2     | Epstein-Barr virus induced gene 2                                                                     |
| 917461 | 3.07 | Tyki     | thymidylate kinase family LPS-inducible member                                                        |
| 722380 | 3.06 | Per1     | period homolog 1 (Drosophila)                                                                         |
| 363166 | 3.04 | Gp1bb    | glycoprotein Ib, beta polypeptide                                                                     |
| 590110 | 3.03 | Ppp1r3e  | protein phosphatase 1, regulatory (inhibitor) subunit 3E                                              |
| 656992 | 3.03 | Pik3r2   | phosphatidylinositol 3-kinase, regulatory subunit, polypeptide 2 (p85 beta)                           |
| 321427 | 3.02 | Gpr17    | G protein-coupled receptor 17                                                                         |
| 305669 | 3.01 | Igk-V8   | immunoglobulin kappa chain variable 8 (V8)                                                            |
| 347623 | 3.01 | Bace1    | beta-site APP cleaving enzyme 1                                                                       |
| 554463 | 3.01 | Serpine2 | serine (or cysteine) peptidase inhibitor, clade E, member 2                                           |
| 830078 | 2.98 | Zbp1     | Z-DNA binding protein 1                                                                               |
| 380612 | 2.97 | F2r12    | coagulation factor II (thrombin) receptor-like 2                                                      |
| 396741 | 2.96 | Tmem106  | transmembrane protein 106A                                                                            |
| 929928 | 2.96 | Sgip1    | SH3-domain GRB2-like (endophilin) interacting protein 1                                               |
| 588490 | 2.96 | Slc22a4  | solute carrier family 22 (organic cation transporter), member 4                                       |
| 927284 | 2.94 | Chst7    | carbohydrate (N-acetylglucosamino) sulfotransferase 7                                                 |
| 734987 | 2.91 | Zhx1     | zinc fingers and homeoboxes protein 1                                                                 |
| 627396 | 2.90 | Igf2     | insulin-like growth factor 2                                                                          |
| 659464 | 2.90 | Lpxn     | leupaxin                                                                                              |
| 481439 | 2.89 | Nfia     | nuclear factor I/A                                                                                    |
| 535513 | 2.89 | Pi4k2b   | phosphatidylinositol 4-kinase type 2 beta                                                             |
| 474404 | 2.88 | Sgip1    | SH3-domain GRB2-like (endophilin) interacting protein 1                                               |
| 351936 | 2.88 | Ap2a1    | adaptor protein complex AP-2, alpha 1 subunit                                                         |
| 775978 | 2.86 | Cd74     | CD74 antigen (invariant polypeptide of major histocompatibility complex, class II antigen-associated) |
| 749630 | 2.85 | Camp     | cathelicidin antimicrobial peptide                                                                    |

|        |      |         |                                                             |
|--------|------|---------|-------------------------------------------------------------|
| 314325 | 2.84 | Spire2  | spire homolog 2 (Drosophila)                                |
| 370259 | 2.84 | Scin    | scinderin                                                   |
| 608001 | 2.84 | Tnfaip2 | tumor necrosis factor, alpha-induced protein 2              |
| 792947 | 2.83 | Papss2  | 3'-phosphoadenosine 5'-phosphosulfate synthase 2            |
| 646473 | 2.80 | Cyp11a1 | cytochrome P450, family 11, subfamily a, polypeptide 1      |
| 446731 | 2.80 | Mapk12  | mitogen-activated protein kinase 12                         |
| 666793 | 2.79 | Zranb3  | zinc finger, RAN-binding domain containing 3                |
| 336709 | 2.79 | Card12  | caspase recruitment domain family, member 12                |
| 860084 | 2.79 | Abcd3   | ATP-binding cassette, sub-family D (ALD), member 3          |
| 443626 | 2.78 | Asph    | aspartate-beta-hydroxylase                                  |
| 543555 | 2.77 | Aldh4a1 | aldehyde dehydrogenase 4 family, member A1                  |
| 474771 | 2.77 | Pspc1   | paraspeckle protein 1                                       |
| 396297 | 2.77 | Stom    | stomatin                                                    |
| 889712 | 2.76 | Rbm3    | RNA binding motif protein 3                                 |
| 427650 | 2.76 | Ryk     | receptor-like tyrosine kinase                               |
| 379453 | 2.76 | Pld4    | phospholipase D family, member 4                            |
| 531037 | 2.75 | F2r12   | coagulation factor II (thrombin) receptor-like 2            |
| 396012 | 2.72 | Slc27a2 | solute carrier family 27 (fatty acid transporter), member 2 |
| 589780 | 2.71 | G6pd2   | glucose-6-phosphate dehydrogenase 2                         |
| 357196 | 2.71 | Ptpn14  | protein tyrosine phosphatase, non-receptor type 14          |
| 743442 | 2.70 | Ubp1    | upstream binding protein 1                                  |
| 912715 | 2.70 | Pitpm1  | phosphatidylinositol membrane-associated 1                  |
| 332919 | 2.69 | Nckap1  | NCK-associated protein 1                                    |
| 450585 | 2.69 | Perl1   | per1-like domain containing 1                               |
| 454527 | 2.68 | Pde3b   | phosphodiesterase 3B, cGMP-inhibited                        |
| 446807 | 2.67 | Usp18   | ubiquitin specific peptidase 18                             |
| 422133 | 2.66 | Tprt    | trans-prenyltransferase                                     |
| 667591 | 2.66 | Dnaja4  | DnaJ (Hsp40) homolog, subfamily A, member 4                 |
| 806203 | 2.66 | Uqcr    | ubiquinol-cytochrome c reductase (6.4kD) subunit            |
| 852872 | 2.65 | Agrn    | agrin                                                       |
| 628979 | 2.64 | Bbs1    | Bardet-Biedl syndrome 1 homolog (human)                     |
| 327321 | 2.64 | Sbf1    | SET binding factor 1                                        |
| 867020 | 2.64 | Galns   | galactosamine (N-acetyl)-6-sulfate sulfatase                |
| 351154 | 2.63 | Cox6a2  | cytochrome c oxidase, subunit VI a, polypeptide 2           |
| 330030 | 2.62 | Kpna1   | karyopherin (importin) alpha 1                              |
| 453393 | 2.61 | Polr3f  | polymerase (RNA) III (DNA directed) polypeptide F           |



|        |      |          |                                                                               |
|--------|------|----------|-------------------------------------------------------------------------------|
| 770768 | 2.61 | Zdhhc6   | zinc finger, DHHC domain containing 6                                         |
| 575859 | 2.60 | Kmo      | kynurenine 3-monooxygenase (kynurenine 3-hydroxylase)                         |
| 892804 | 2.60 | Kpna2    | karyopherin (importin) alpha 2                                                |
| 905559 | 2.59 | Bcas1    | breast carcinoma amplified sequence 1                                         |
| 417004 | 2.59 | Sdc3     | syndecan 3                                                                    |
| 818736 | 2.58 | Sqrdl    | sulfide quinone reductase-like (yeast)                                        |
| 930152 | 2.58 | Cxcl10   | chemokine (C-X-C motif) ligand 10                                             |
| 778878 | 2.57 | Mamdc2   | MAM domain containing 2                                                       |
| 422587 | 2.57 | Eppb9    | endothelial precursor protein B9                                              |
| 902369 | 2.57 | Hspd1    | heat shock protein 1 (chaperonin)                                             |
| 773899 | 2.56 | Spred1   | sprouty protein with EVH-1 domain 1, related sequence                         |
| 827226 | 2.56 | Igf2r    | insulin-like growth factor 2 receptor                                         |
| 724112 | 2.56 | Taf9l    | TAF9-like RNA polymerase II, TATA box binding protein (TBP)-associated factor |
| 332817 | 2.56 | Tcf20    | transcription factor 20                                                       |
| 619584 | 2.55 | Sult1a1  | sulfotransferase family 1A, phenol-preferring, member 1                       |
| 461904 | 2.54 | Slc14a1  | solute carrier family 14 (urea transporter), member 1                         |
| 324662 | 2.54 | Tsga14   | testis specific gene A14                                                      |
| 869327 | 2.53 | Sh2d4a   | SH2 domain containing 4A                                                      |
| 344622 | 2.52 | Copb1    | coatamer protein complex, subunit beta 1                                      |
| 873820 | 2.52 | Tjp1     | tight junction protein 1                                                      |
| 743085 | 2.52 | Gda      | guanine deaminase                                                             |
| 437964 | 2.49 | Mcts1    | malignant T cell amplified sequence 1                                         |
| 386295 | 2.48 | Cxcl4    | chemokine (C-X-C motif) ligand 4                                              |
| 464550 | 2.48 | Slc2a8   | solute carrier family 2, (facilitated glucose transporter), member 8          |
| 416337 | 2.48 | Hsd11b1  | hydroxysteroid 11-beta dehydrogenase 1                                        |
| 561901 | 2.47 | Casp3    | caspase 3                                                                     |
| 309377 | 2.47 | Cars     | cysteinyl-tRNA synthetase                                                     |
| 909545 | 2.46 | Hspa5bp  | heat shock 70kDa protein 5 binding protein 1                                  |
| 611967 | 2.46 | RP23-14I | null                                                                          |
| 847836 | 2.46 | Gzmd     | granzyme D                                                                    |
| 360619 | 2.45 | Tbc1d12  | TBC1D12: TBC1 domain family, member 12                                        |
| 704890 | 2.44 | Clec12a  | C-type lectin domain family 12, member a                                      |
| 712928 | 2.44 | Pdzk4    | PDZ domain containing 4                                                       |
| 884267 | 2.43 | Cd53     | CD53 antigen                                                                  |
| 918558 | 2.41 | Drd1ip   | dopamine receptor D1 interacting protein                                      |
| 376218 | 2.41 | Gpc1     | glypican 1                                                                    |

|        |      |          |                                                                                     |
|--------|------|----------|-------------------------------------------------------------------------------------|
| 401663 | 2.40 | Plxnc1   | plexin C1                                                                           |
| 643794 | 2.39 | Rbm27    | RNA binding motif protein 27                                                        |
| 797894 | 2.38 | Lgmn     | legumain                                                                            |
| 690134 | 2.38 | Metap1   | methionyl aminopeptidase 1                                                          |
| 837469 | 2.38 | Mx2      | myxovirus (influenza virus) resistance 2                                            |
| 585818 | 2.38 | Ctss     | cathepsin S                                                                         |
| 905318 | 2.38 | Asahl    | N-acylsphingosine amidohydrolase (acid ceramidase)-like                             |
| 920516 | 2.37 | Cdk5rap1 | CDK5 regulatory subunit associated protein 1                                        |
| 353509 | 2.37 | Icos     | inducible T-cell co-stimulator                                                      |
| 831603 | 2.36 | Muted    | muted                                                                               |
| 425787 | 2.35 | Nkx2-3   | NK2 transcription factor related, locus 3 (Drosophila)                              |
| 463125 | 2.35 | Ppp2r1b  | protein phosphatase 2 (formerly 2A), regulatory subunit A (PR 65), beta isoform     |
| 733267 | 2.34 | Fmn11    | formin-like 1                                                                       |
| 635665 | 2.33 | Rabl3    | RAB, member of RAS oncogene family-like 3                                           |
| 639587 | 2.33 | Gng12    | guanine nucleotide binding protein (G protein), gamma 12                            |
| 835985 | 2.33 | Sec61a2  | Sec61, alpha subunit 2 (S. cerevisiae)                                              |
| 573548 | 2.32 | Ext2     | exostoses (multiple) 2                                                              |
| 697664 | 2.32 | Evl      | Ena-vasodilator stimulated phosphoprotein                                           |
| 860165 | 2.31 | Sephs2   | selenophosphate synthetase 2                                                        |
| 906490 | 2.31 | Apoe     | apolipoprotein E                                                                    |
| 515157 | 2.31 | Mipep    | mitochondrial intermediate peptidase                                                |
| 336418 | 2.31 | Mocs3    | molybdenum cofactor synthesis 3                                                     |
| 754600 | 2.31 | Epn1     | epsin 1                                                                             |
| 424542 | 2.30 | Aarsl    | alanyl-tRNA synthetase like                                                         |
| 383522 | 2.30 | Ankrd48  | ankyrin repeat domain 48                                                            |
| 528992 | 2.29 | Cecr5    | cat eye syndrome chromosome region, candidate 5 homolog (human)                     |
| 772659 | 2.27 | Slc30a3  | solute carrier family 30 (zinc transporter), member 3                               |
| 387395 | 2.27 | Tmem49   | transmembrane protein 49                                                            |
| 928126 | 2.27 | Tcf2a    | transcription factor E2a                                                            |
| 447951 | 2.26 | Plvap    | plasmalemma vesicle associated protein                                              |
| 629938 | 2.26 | Galnt10  | UDP-N-acetyl-alpha-D-galactosamine:polypeptide N-acetylgalactosaminyltransferase 10 |
| 536618 | 2.26 | Lzf      | leucine zipper domain protein                                                       |
| 717650 | 2.25 | Piga     | phosphatidylinositol glycan, class A                                                |
| 916992 | 2.25 | Sdf211   | stromal cell-derived factor 2-like 1                                                |
| 633576 | 2.25 | Upk3a    | uroplakin 3A                                                                        |
| 419158 | 2.25 | Abcb7    | ATP-binding cassette, sub-family B (MDR/TAP), member 7                              |

|        |      |         |                                                                                            |
|--------|------|---------|--------------------------------------------------------------------------------------------|
| 644283 | 2.25 | Kif1c   | kinesin family member 1C                                                                   |
| 932865 | 2.24 | Sbk1    | SH3-binding kinase 1                                                                       |
| 530448 | 2.22 | Aars    | alanyl-tRNA synthetase                                                                     |
| 580896 | 2.22 | Rpl10a  | ribosomal protein L10A                                                                     |
| 313957 | 2.22 | Hmgcr   | 3-hydroxy-3-methylglutaryl-Coenzyme A reductase                                            |
| 604659 | 2.22 | Wdr68   | WD repeat domain 68                                                                        |
| 351320 | 2.22 | Mcm2    | minichromosome maintenance deficient 2 mitotin ( <i>S. cerevisiae</i> )                    |
| 655072 | 2.22 | Cad     | carbamoyl-phosphate synthetase 2, aspartate transcarbamylase, and dihydroorotase           |
| 625863 | 2.21 | Gp5     | glycoprotein 5 (platelet)                                                                  |
| 834819 | 2.21 | Gdpd1   | glycerophosphodiester phosphodiesterase domain containing 1                                |
| 776420 | 2.20 | Dctn1   | dynactin 1                                                                                 |
| 785382 | 2.20 | Slc7a3  | solute carrier family 7 (cationic amino acid transporter, y <sup>+</sup> system), member 3 |
| 336724 | 2.19 | Pklr    | pyruvate kinase liver and red blood cell                                                   |
| 667991 | 2.19 | Phf11   | PHD finger protein 11                                                                      |
| 678760 | 2.19 | Ms4a6b  | membrane-spanning 4-domains, subfamily A, member 6B                                        |
| 860102 | 2.18 | Cacng6  | calcium channel, voltage-dependent, gamma subunit 6                                        |
| 701888 | 2.18 | Cox10   | COX10 homolog, cytochrome c oxidase assembly protein, heme A: farnesyltransferase (yeast)  |
| 346743 | 2.17 | Slc1a2  | solute carrier family 1 (glial high affinity glutamate transporter), member 2              |
| 793521 | 2.17 | Dhx38   | DEAH (Asp-Glu-Ala-His) box polypeptide 38                                                  |
| 332683 | 2.17 | Olf129  | olfactory receptor 129                                                                     |
| 582299 | 2.17 | Kbtbd8  | kelch repeat and BTB (POZ) domain containing 8                                             |
| 764650 | 2.16 | Cic     | capicua homolog ( <i>Drosophila</i> )                                                      |
| 577661 | 2.16 | Slc2a6  | solute carrier family 2 (facilitated glucose transporter), member 6                        |
| 328946 | 2.16 | Wwp1    | WW domain containing E3 ubiquitin protein ligase 1                                         |
| 852935 | 2.16 | L3mbtl2 | l(3)mbt-like 2 ( <i>Drosophila</i> )                                                       |
| 928190 | 2.16 | Cherp   | calcium homeostasis endoplasmic reticulum protein                                          |
| 927515 | 2.15 | Ncln    | nicalin homolog (zebrafish)                                                                |
| 924582 | 2.15 | Capn1   | calpain 1                                                                                  |
| 391307 | 2.15 | Mrps2   | mitochondrial ribosomal protein S2                                                         |
| 316561 | 2.15 | Zdhhc13 | zinc finger, DHHC domain containing 13                                                     |
| 908186 | 2.15 | Itgb2   | integrin beta 2                                                                            |
| 387754 | 2.15 | Atp7b   | ATPase, Cu <sup>++</sup> transporting, beta polypeptide                                    |
| 651349 | 2.14 | Mx1     | myxovirus (influenza virus) resistance 1                                                   |
| 803271 | 2.14 | Cbr3    | carbonyl reductase 3                                                                       |
| 335671 | 2.14 | Park2   | parkin                                                                                     |
| 896311 | 2.14 | Rfwd2   | ring finger and WD repeat domain 2                                                         |

|        |      |          |                                                                                                                               |
|--------|------|----------|-------------------------------------------------------------------------------------------------------------------------------|
| 572196 | 2.14 | Sec23ip  | Sec23 interacting protein                                                                                                     |
| 883690 | 2.14 | Pfc      | properdin factor, complement                                                                                                  |
| 464308 | 2.13 | Oas2     | 2'-5' oligoadenylate synthetase 2                                                                                             |
| 349419 | 2.13 | Msl31    | male-specific lethal-3 homolog 1 (Drosophila)                                                                                 |
| 917039 | 2.13 | Slc39a8  | solute carrier family 39 (metal ion transporter), member 8                                                                    |
| 928327 | 2.13 | Ccl6     | chemokine (C-C motif) ligand 6                                                                                                |
| 326326 | 2.13 | Aytl1    | acyltransferase like 1                                                                                                        |
| 310124 | 2.13 | Gak      | cyclin G associated kinase                                                                                                    |
| 849990 | 2.12 | Def8     | differentially expressed in FDCP 8                                                                                            |
| 541982 | 2.12 | Tmc5     | transmembrane channel-like gene family 5                                                                                      |
| 668434 | 2.11 | Paqr5    | progesterin and adipoQ receptor family member V                                                                               |
| 504114 | 2.11 | Oat      | ornithine aminotransferase                                                                                                    |
| 483005 | 2.11 | Galgt1   | UDP-N-acetyl-alpha-D-galactosamine:(N-acetylneuraminy)-galactosylglucosylceramide-beta-1, 4-N-acetylgalactosaminyltransferase |
| 847789 | 2.11 | Ccr5     | chemokine (C-C motif) receptor 5                                                                                              |
| 537829 | 2.10 | Ppp2r5b  | protein phosphatase 2, regulatory subunit B (B56), beta isoform                                                               |
| 814027 | 2.10 | Sympk    | symplekin                                                                                                                     |
| 699232 | 2.10 | Tpbg     | trophoblast glycoprotein                                                                                                      |
| 431194 | 2.10 | Syvn1    | synovial apoptosis inhibitor 1, synoviolin                                                                                    |
| 534592 | 2.10 | Rhot1    | ras homolog gene family, member T1                                                                                            |
| 656406 | 2.10 | Pon2     | paraoxonase 2                                                                                                                 |
| 560649 | 2.09 | Pyy      | peptide YY                                                                                                                    |
| 462996 | 2.09 | Olfir591 | olfactory receptor 591                                                                                                        |
| 780725 | 2.08 | Nudcd1   | NudC domain containing 1                                                                                                      |
| 811535 | 2.08 | Txndc1   | thioredoxin domain containing 1                                                                                               |
| 713706 | 2.08 | Bysl     | bystin-like                                                                                                                   |
| 482989 | 2.08 | Cebpd    | CCAAT/enhancer binding protein (C/EBP), delta                                                                                 |
| 657040 | 2.07 | Dlst     | dihydrolipoamide S-succinyltransferase (E2 component of 2-oxo-glutarate complex)                                              |
| 869360 | 2.07 | Smpd1    | sphingomyelin phosphodiesterase 1, acid lysosomal                                                                             |
| 759510 | 2.07 | Npr2     | natriuretic peptide receptor 2                                                                                                |
| 623205 | 2.07 | Gmppb    | GDP-mannose pyrophosphorylase B                                                                                               |
| 929349 | 2.07 | Rps6ka4  | ribosomal protein S6 kinase, polypeptide 4                                                                                    |
| 723765 | 2.07 | Ipo13    | importin 13                                                                                                                   |
| 547528 | 2.06 | Apobec3  | apolipoprotein B editing complex 3                                                                                            |
| 480314 | 2.06 | Magee2   | melanoma antigen, family E, 2                                                                                                 |
| 751264 | 2.06 | Rab11fip | RAB11 family interacting protein 1 (class I)                                                                                  |

|        |      |         |                                                                      |
|--------|------|---------|----------------------------------------------------------------------|
| 684049 | 2.05 | Foxj3   | forkhead box J3                                                      |
| 663732 | 2.05 | Sdccag8 | serologically defined colon cancer antigen 8                         |
| 918527 | 2.05 | Sipa111 | signal-induced proliferation-associated 1 like 1                     |
| 389558 | 2.04 | Snx25   | sorting nexin 25                                                     |
| 645493 | 2.03 | Rbm15b  | RNA binding motif protein 15B                                        |
| 522671 | 2.03 | Gpr18   | G protein-coupled receptor 18                                        |
| 311434 | 2.02 | Pdia2   | protein disulfide isomerase associated 2                             |
| 894994 | 2.02 | Amd2    | S-adenosylmethionine decarboxylase 2                                 |
| 382399 | 2.02 | Armc8   | armadillo repeat containing 8                                        |
| 670317 | 2.02 | Myh14   | myosin, heavy polypeptide 14                                         |
| 686105 | 2.02 | Slc20a1 | solute carrier family 20, member 1                                   |
| 378643 | 2.02 | Uty     | ubiquitously transcribed tetratricopeptide repeat gene, Y chromosome |
| 730256 | 2.02 | Hbs11   | Hbs1-like ( <i>S. cerevisiae</i> )                                   |
| 655779 | 2.02 | Tmem18  | transmembrane protein 18                                             |
| 372512 | 2.01 | Fpgt    | fucose-1-phosphate guanylyltransferase                               |
| 361433 | 2.01 | F2r     | coagulation factor II (thrombin) receptor                            |
| 466841 | 2.01 | Ccne1   | cyclin E1                                                            |
| 864607 | 2.00 | Psm11   | proteasome (prosome, macropain) 26S subunit, non-ATPase, 11          |
| 447331 | 2.00 | Thop1   | thimet oligopeptidase 1                                              |
| 766063 | 2.00 | Optc    | opticin                                                              |
| 854794 | 2.00 | Zfp101  | zinc finger protein 101                                              |
| 379462 | 2.00 | Clu     | clusterin                                                            |
| 776862 | 2.00 | Ap2b1   | adaptor-related protein complex 2, beta 1 subunit                    |
| 596173 | 2.00 | Stk24   | serine/threonine kinase 24 (STE20 homolog, yeast)                    |
| 303973 | 2.00 | Hsd17b4 | hydroxysteroid (17-beta) dehydrogenase 4                             |
